# Supplementary material for: A combined first principles and experimental approach to Bi2WO6
Source: Royal Society of Chemistry journal article supplement (doi:10.1039/d3ra06648g), 2023-01-01
Supplement: d3ra06648g1.pdf [file d3ra06648g1.pdf]

**Supporting Information**  
for  
**“A Combined First Principles and Experimental Approach to  
Bi<sub>2</sub>WO<sub>6</sub>”**

Quazi Shafayat Hossain,<sup>1</sup> Sadiq Shahriyar Nishat,<sup>2</sup> Mohsina Sultana,<sup>1</sup> Tasnim  
Ahmed Mahi,<sup>1,3</sup> Shahrar Ahmed,<sup>1,4</sup> M. N. I. Khan,<sup>5</sup> H. N. Das,<sup>5</sup> Muhammad  
Shahriar Bashar,<sup>6</sup> Umme Sarmeen Akhtar,<sup>7</sup> Sharmin Jahan,<sup>8</sup> Fariha Chowdhury,<sup>9</sup>  
Khandker Saadat Hossain,<sup>10</sup> Sazzad M.S. Imran,<sup>1</sup> and Imtiaz Ahmed<sup>1,\*</sup>

<sup>1</sup>*Materials Science Research Laboratory,  
Department of Electrical and Electronic Engineering,  
University of Dhaka, Dhaka-1000, Bangladesh*

<sup>2</sup>*Department of Materials Science and Engineering,  
Rensselaer Polytechnic Institute, Troy, NY, USA*

<sup>3</sup>*Semiconductor Technology Research Centre,  
University of Dhaka, Dhaka-1000, Bangladesh*

<sup>4</sup>*Institute of Mining, Mineralogy and Metallurgy,  
Bangladesh Council of Scientific and Industrial Research, Joypurhat-5900, Bangladesh*

<sup>5</sup>*Materials Science Division, Atomic Energy Centre, Dhaka-1000, Bangladesh*

<sup>6</sup>*Institute of Energy Research and Development,  
Bangladesh Council of Scientific and Industrial Research, Dhaka-1205, Bangladesh*

<sup>7</sup>*Institute of Glass and Ceramic Research and Testing,  
Bangladesh Council of Scientific and Industrial Research, Dhaka-1205, Bangladesh*

<sup>8</sup>*Institute of Energy Science and Technology,  
Bangladesh Council of Scientific and Industrial Research, Dhaka-1205, Bangladesh*

<sup>9</sup>*Biomedical and Toxicological Research Institute,  
Bangladesh Council of Scientific and Industrial Research, Dhaka-1205, Bangladesh*

<sup>10</sup>*Nanophysics and Soft Matter Laboratory, Department of Physics,  
University of Dhaka, Dhaka-1000, Bangladesh*

## I. XRD ANALYSIS

---

\* imtiaz@du.ac.bd

| Crystallographic Parameters, Bond Lengths and Bond Angles |          |         |         |         |              |             |              |                       |                     |                      |          |  |
|-----------------------------------------------------------|----------|---------|---------|---------|--------------|-------------|--------------|-----------------------|---------------------|----------------------|----------|--|
| Sample/DFT                                                | Sym.     | $a$ (Å) | $b$ (Å) | $c$ (Å) | $\alpha$ (°) | $\beta$ (°) | $\gamma$ (°) | $V$ (Å <sup>3</sup> ) | $d_{W-O}$ (Å)       | $d_{Bi-O}$ (Å)       | $\chi^2$ |  |
| SBWO                                                      | $Pca2_1$ | 5.433   | 16.415  | 5.454   | 90           | 90          | 90           | 486.442               | 1.797, 1.803, 1.859 | 2.182, 2.242, 2.302  | 1.75     |  |
|                                                           |          |         |         |         |              |             |              |                       | 1.862, 2.135, 2.144 | 2.441, 2.498, 2.500  |          |  |
| HBWO-U                                                    | $Pca2_1$ | 5.449   | 16.348  | 5.450   | 90           | 90          | 90           | 485.487               | 1.806, 1.853        | 2.180, 2.241, 2.300  | 1.45     |  |
|                                                           |          |         |         |         |              |             |              |                       | 2.135, 2.147        | 2.438, 2.500, 2.502  |          |  |
| HBWO-S                                                    | $Pca2_1$ | 5.452   | 16.340  | 5.440   | 90           | 90          | 90           | 484.601               | 1.805, 1.852        | 2.179, 2.240, 2.298  | 1.27     |  |
|                                                           |          |         |         |         |              |             |              |                       | 1.854, 2.133, 2.146 | 2.434, 2.498, 2.502  |          |  |
| GGA-PBE                                                   | $Pca2_1$ | 5.551   | 16.882  | 5.591   | 90           | 90          | 90           | 523.938               | 1.819, 1.886        | 1.791, 1.815, 1.851  |          |  |
|                                                           |          |         |         |         |              |             |              |                       | 1.889, 2.204, 2.216 | 1.887, 2.142, 2.209  |          |  |
| GGA-PBE+ $U_d$ (2 eV)+ $U_p$ (2 eV)                       | $Pca2_1$ | 5.515   | 16.979  | 5.558   | 90           | 90          | 90           | 520.393               | 1.895, 1.901, 1.902 | 1.831, 1.846, 1.893  |          |  |
|                                                           |          |         |         |         |              |             |              |                       | 1.903, 2.021, 2.027 | 1.922, 1.9898, 2.160 |          |  |
| GGA-PBE+ $U_d$ (5 eV)+ $U_p$ (5 eV)                       | $Pca2_1$ | 5.468   | 17.111  | 5.514   | 90           | 90          | 90           | 515.931               | 1.895, 1.901, 1.902 | 1.864, 1.887, 1.900  |          |  |
|                                                           |          |         |         |         |              |             |              |                       | 1.903, 2.021, 2.027 | 1.926, 1.987, 2.085  |          |  |
| GGA-PBE+ $U_d$ (7 eV)+ $U_p$ (7 eV)                       | $Pca2_1$ | 5.438   | 17.206  | 5.488   | 90           | 90          | 90           | 513.416               | 1.895, 1.901, 1.902 | 1.897, 1.899, 1.904  |          |  |
|                                                           |          |         |         |         |              |             |              |                       | 1.903, 2.021, 2.027 | 1.925, 1.967, 2.028  |          |  |
| GGA-PBE+ $U_d$ (9 eV)+ $U_p$ (9 eV)                       | $Pca2_1$ | 5.422   | 17.263  | 5.477   | 90           | 90          | 90           | 512.634               | 1.895, 1.901, 1.902 | 1.907, 1.918, 1.924  |          |  |
|                                                           |          |         |         |         |              |             |              |                       | 1.903, 2.021, 2.027 | 1.937, 1.954, 1.991  |          |  |
| GGA-PBE+ $U_d$ (12 eV)+ $U_p$ (12 eV)                     | $Pca2_1$ | 5.408   | 17.340  | 5.478   | 90           | 90          | 90           | 513.716               | 1.895, 1.901, 1.902 | 1.910, 1.923, 1.941  |          |  |
|                                                           |          |         |         |         |              |             |              |                       | 1.903, 2.021, 2.027 | 1.952, 1.964, 1.974  |          |  |
| GGA-PBE+ $U_d$ (14 eV)+ $U_p$ (14 eV)                     | $Pca2_1$ | 5.401   | 17.404  | 5.482   | 90           | 90          | 90           | 515.284               | 1.895, 1.901, 1.902 | 1.912, 1.922, 1.946  |          |  |
|                                                           |          |         |         |         |              |             |              |                       | 1.903, 2.021, 2.027 | 1.954, 1.961, 1.970  |          |  |

TABLE S1. Crystallographic parameters of SBWO, HBWO-U, and HBEO-S samples along with that of GGA-PBE and GGA-PBE+ $U_d$ + $U_p$  for different values of  $U_d$  and  $U_p$ .

| Crystallographic Parameters, Bond Lengths and Bond Angles |          |               |               |               |                    |                   |                    |                 |                            |                             |          |
|-----------------------------------------------------------|----------|---------------|---------------|---------------|--------------------|-------------------|--------------------|-----------------|----------------------------|-----------------------------|----------|
| Sample/DFT                                                | Sym.     | $a(\text{Å})$ | $b(\text{Å})$ | $c(\text{Å})$ | $\alpha(^{\circ})$ | $\beta(^{\circ})$ | $\gamma(^{\circ})$ | $V(\text{Å}^3)$ | $d_{\text{W-O}}(\text{Å})$ | $d_{\text{Bi-O}}(\text{Å})$ | $\chi^2$ |
| SBWO                                                      | $Pca2_1$ | 5.43316       | 4.15545       | 4.54900       | 90                 | 90                | 90                 | 486.442         | 1.797, 1.803, 1.8592       | 1.182, 2.242, 2.302         | 1.75     |
|                                                           |          |               |               |               |                    |                   |                    |                 | 1.862, 2.135, 2.1442       | 2.441, 2.498, 2.500         |          |
| HBWO-U                                                    | $Pca2_1$ | 5.44916       | 3.34854       | 4.50900       | 90                 | 90                | 90                 | 485.487         | 1.799, 1.806, 1.8532       | 1.180, 2.241, 2.300         | 1.45     |
|                                                           |          |               |               |               |                    |                   |                    |                 | 1.855, 2.135, 2.1472       | 2.438, 2.500, 2.502         |          |
| HBWO-S                                                    | $Pca2_1$ | 5.45216       | 3.34054       | 4.40900       | 90                 | 90                | 90                 | 484.601         | 1.797, 1.805, 1.8522       | 1.179, 2.240, 2.298         | 1.27     |
|                                                           |          |               |               |               |                    |                   |                    |                 | 1.854, 2.133, 2.1462       | 2.434, 2.498, 2.502         |          |
| GGA-PBE+vdW                                               | $Pca2_1$ | 5.50816       | 6.16551       | 7.90000       | 90                 | 90                | 90                 | 504.921         | 1.819, 1.819, 1.8832       | 2.214, 2.275, 2.340         |          |
|                                                           |          |               |               |               |                    |                   |                    |                 | 1.883, 2.158, 2.1582       | 2.469, 2.499, 2.517         |          |
| GGA-PBE+ $U_d$ (2 eV)+ $U_p$ (2 eV)+vdW                   | $Pca2_1$ | 5.48316       | 6.66754       | 8.88900       | 90                 | 90                | 90                 | 501.493         | 1.835, 1.835, 1.8882       | 2.209, 2.275, 2.328         |          |
|                                                           |          |               |               |               |                    |                   |                    |                 | 1.888, 2.114, 2.1142       | 2.485, 2.492, 2.506         |          |
| GGA-PBE+ $U_d$ (5 eV)+ $U_p$ (5 eV)+vdW                   | $Pca2_1$ | 5.44016       | 8.00545       | 1.90000       | 90                 | 90                | 90                 | 498.105         | 1.869, 1.869, 1.8952       | 2.203, 2.277, 2.304         |          |
|                                                           |          |               |               |               |                    |                   |                    |                 | 1.895, 2.044, 2.0442       | 2.475, 2.494, 2.508         |          |
| GGA-PBE+ $U_d$ (7 eV)+ $U_p$ (7 eV)+vdW                   | $Pca2_1$ | 5.41616       | 8.68543       | 2.90000       | 90                 | 90                | 90                 | 496.216         | 1.898, 1.898, 1.9002       | 1.199, 2.283, 2.287         |          |
|                                                           |          |               |               |               |                    |                   |                    |                 | 1.900, 1.996, 1.9962       | 2.457, 2.484, 2.536         |          |
| GGA-PBE+ $U_d$ (9 eV)+ $U_p$ (9 eV)+vdW                   | $Pca2_1$ | 5.40416       | 9.13542       | 3.90000       | 90                 | 90                | 90                 | 495.778         | 1.900, 1.900, 1.9192       | 1.192, 2.274, 2.287         |          |
|                                                           |          |               |               |               |                    |                   |                    |                 | 1.919, 1.971, 1.9712       | 2.444, 2.486, 2.551         |          |
| GGA-PBE+ $U_d$ (12 eV)+ $U_p$ (12 eV)+vdW                 | $Pca2_1$ | 5.39316       | 9.63542       | 4.90000       | 90                 | 90                | 90                 | 496.259         | 1.902, 1.902, 1.9322       | 1.180, 2.261, 2.285         |          |
|                                                           |          |               |               |               |                    |                   |                    |                 | 1.932, 1.958, 1.9582       | 2.431, 2.503, 2.548         |          |
| GGA-PBE+ $U_d$ (14 eV)+ $U_p$ (14 eV)+vdW                 | $Pca2_1$ | 5.38717       | 10.07542      | 5.90000       | 90                 | 90                | 90                 | 497.051         | 1.895, 1.895, 1.9042       | 1.169, 2.254, 2.282         |          |
|                                                           |          |               |               |               |                    |                   |                    |                 | 1.935, 1.956, 1.9562       | 2.424, 2.523, 2.535         |          |

TABLE S2. Crystallographic parameters of SBWO, HBWO-U, and HBEO-S samples along with that of GGA-PBE+vdW and GGA-PBE+ $U_d$ + $U_p$ +vdW for different values of  $U_d$  and  $U_p$ . The van der Waals (vdW) interaction was included with the DFT-D3 method including Becke-Johnson (B-J) damping.

## II. RAMAN ANALYSIS

TABLE S3. RT experimental Raman peaks of SBWO, HBWO-U, and HBWO-S samples along with that of DFT (GGA-PBE and GGA-PBE+ $U_d+U_p$ ) simulations. ELM: External Lattice Mode, AD: Asymmetric Distortion, SBV: Symmetric Bending Vibrations, ABV: Asymmetric Bending Vibrations, TM: Translational Mode, ABrM: Asymmetric Bridging Mode, AST: Asymmetric Stretching.

| Raman Peak Analysis  |                      |                      |                      |                      |          |                                                       |
|----------------------|----------------------|----------------------|----------------------|----------------------|----------|-------------------------------------------------------|
| SBWO                 | HBWO-U               | HBWO-S               | GGA-PBE              | GGA-PBE+ $U_d+U_p$   | Symm.    | Peak Assignment                                       |
| ( $\text{cm}^{-1}$ ) |          |                                                       |
| -                    | 129                  | 139                  | 129                  | 128                  | $E_g$    | ELM                                                   |
| 153                  | 152                  | 152                  | 154                  | 158                  | $A_{1g}$ | ELM                                                   |
| -                    | 222                  | 225                  | 222                  | 228                  | $B_{1g}$ | WO <sub>6</sub> AD                                    |
| 242                  | 255                  | 260                  | 254                  | 260                  | $A_{1g}$ | Bi-O SBV                                              |
| 283                  | 282                  | 283                  | 274                  | 282                  | $E_g$    | WO <sub>6</sub> ABV                                   |
| 295                  | 300                  | 306                  | 296                  | 298                  | $E_g$    | Bi <sup>3+</sup> and WO <sub>6</sub> <sup>6-</sup> TM |
| 406                  | 413                  | 417                  | 408                  | 412                  | $E_g$    | WO <sub>6</sub> ABV                                   |
| 711                  | 716                  | 704                  | 713                  | 716                  | $B_{1g}$ | WO <sub>6</sub> ABrM                                  |
| -                    | -                    | 724                  | 731                  | 732                  | $B_{1g}$ | O-W-O AST                                             |
| 800                  | 796                  | 796                  | 794                  | 804                  | $B_{1g}$ | WO <sub>6</sub> ABrM                                  |
| -                    | 814                  | 821                  | 811                  | 834                  | $B_{1g}$ | O-W-O AST                                             |

## III. FTIR ANALYSIS

TABLE S4. The SBWO, HBWO-U, and HBWO-S samples' FTIR peak designations to corresponding atomic motion along with DFT-derived peaks of phonon density of states for GGA-PBE+vdW and GGA-PBE+ $U_d+U_p$ +vdW. SV: Symmetric Vibration, AST: Asymmetric Stretching, SST: Symmetric Stretching, BV: Bending Vibration.

| FTIR Peak Analysis   |                      |                      |                      |                         |  |                 |
|----------------------|----------------------|----------------------|----------------------|-------------------------|--|-----------------|
| SBWO                 | HBWO-U               | HBWO-S               | GGA-PBE+vdW          | GGA-PBE+ $U_d+U_p$ +vdW |  | Peak Assignment |
| ( $\text{cm}^{-1}$ )    |  |                 |
| 417                  | 427                  | 427                  | 419                  | 424                     |  | Bi-O SST        |
| 533                  | 565                  | 565                  | 526                  | 540                     |  | Bi-O-Bi AST     |
| 680                  | 703                  | 697                  | 684                  | 678                     |  | W-O SST         |
| 818                  | 812                  | 820                  | 782                  | 814                     |  | Bi-O SST        |
| 958                  | -                    | -                    | 915                  | 930                     |  | O-H BV          |
| 1056                 | 1026                 | 1029                 | -                    | -                       |  | W-O SST         |
| -                    | 1108                 | -                    | -                    | -                       |  | C-C SST         |
| -                    | 1314                 | 1392                 | -                    | -                       |  | C=O SST         |
| -                    | 1636                 | 1627                 | -                    | -                       |  | O-H SST         |
| -                    | 3471                 | 3469                 | -                    | -                       |  | O-H BV          |

#### IV. EDX ANALYSIS

The EDX spectra in Fig. S1 presents the characteristic peaks of X-ray radiation for Bi ( $L_\alpha = 10.79$  keV,  $L_\beta = 13.00$  keV,  $M_\alpha = 2.42$  keV, W ( $L_\alpha = 8.25$  keV,  $L_\beta = 9.75$  keV, and  $M_\alpha = 1.85$  keV) in all samples.

TABLE S5. Chemical species identification, atomic percentage at. (%) and weight percentage wt. (%) concentration analysis using EDX (Model: EDAX Team) of SBWO, HBWO-U, and HBWO-S.

| EDX Analysis |         |                     |                   |                     |                   |
|--------------|---------|---------------------|-------------------|---------------------|-------------------|
| Sample       | Element | at. (%)<br>(Theory) | at. (%)<br>(Exp.) | wt. (%)<br>(Theory) | wt. (%)<br>(Exp.) |
| SBWO         | Bi      | 22.22               | 22.8              | 59.89               | 59                |
|              | W       | 11.11               | 10.79             | 26.35               | 27.31             |
|              | O       | 66.67               | 66.41             | 13.76               | 13.69             |
| HBWO-U       | Bi      | 22.22               | 22.39             | 59.89               | 59.89             |
|              | W       | 11.11               | 11.12             | 26.35               | 26.66             |
|              | O       | 66.67               | 66.49             | 13.76               | 13.45             |
| HBWO-S       | Bi      | 22.22               | 22.16             | 59.89               | 59.9              |
|              | W       | 11.11               | 11.37             | 26.35               | 26.38             |
|              | O       | 66.67               | 66.47             | 13.76               | 13.72             |

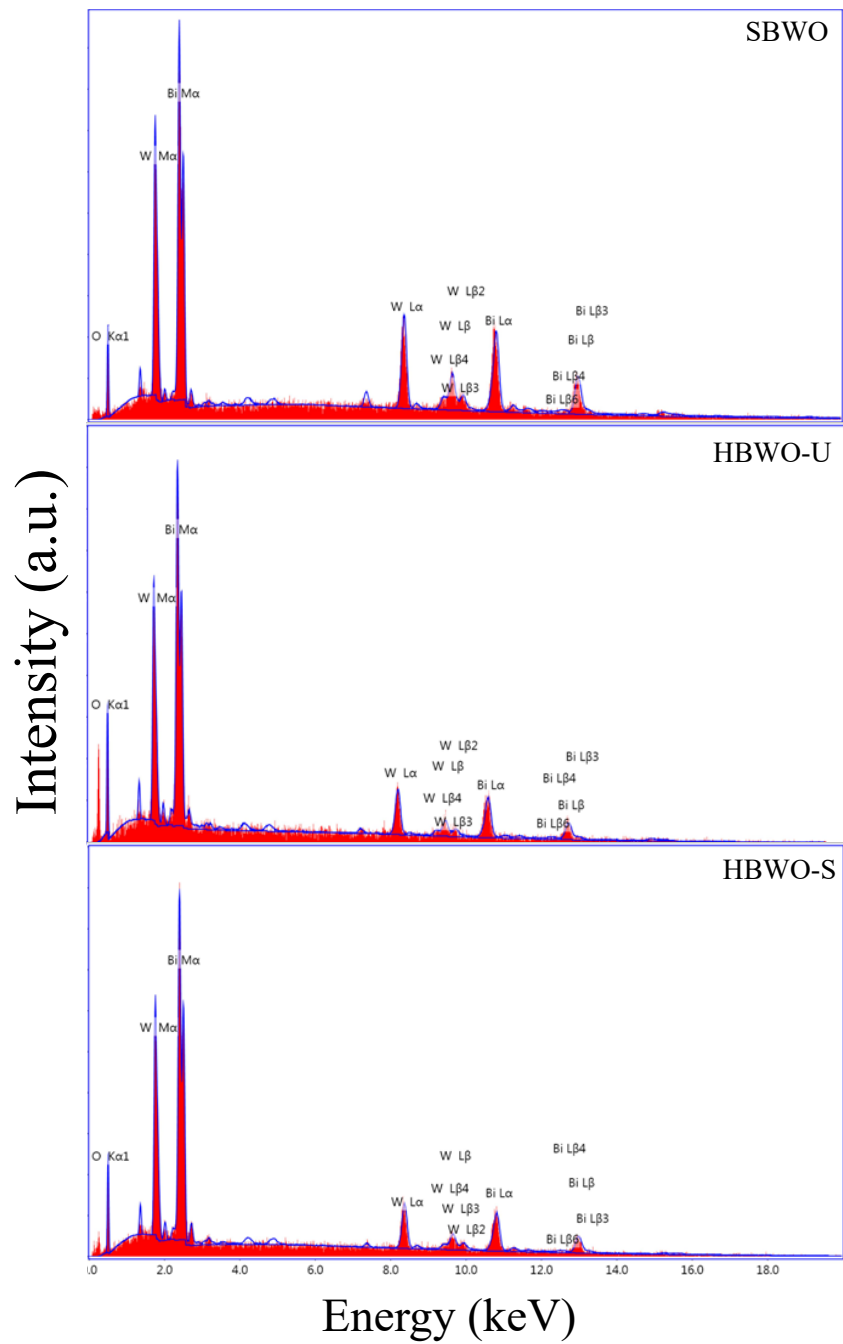

FIG. S1. EDX spectra of (a) SBWO, (b) SBWO-U, and (c) SBWO-S measured by EDX Model: EDAX Team machine.

## V. ELECTRONIC PROPERTIES SIMULATION

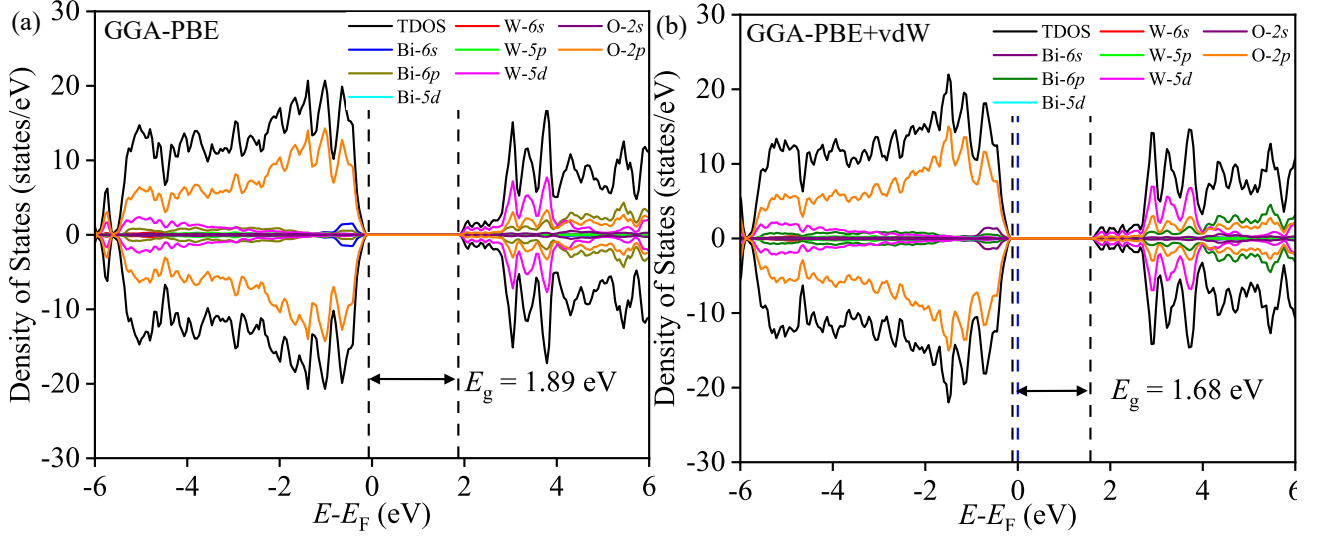

FIG. S2. TDOS and PDOS of BWO for (a) GGA-PBE and (b) GGA-PBE+vdW functionals. The inclusion of vdW force reduces the band gap  $E_g$  in DOS.

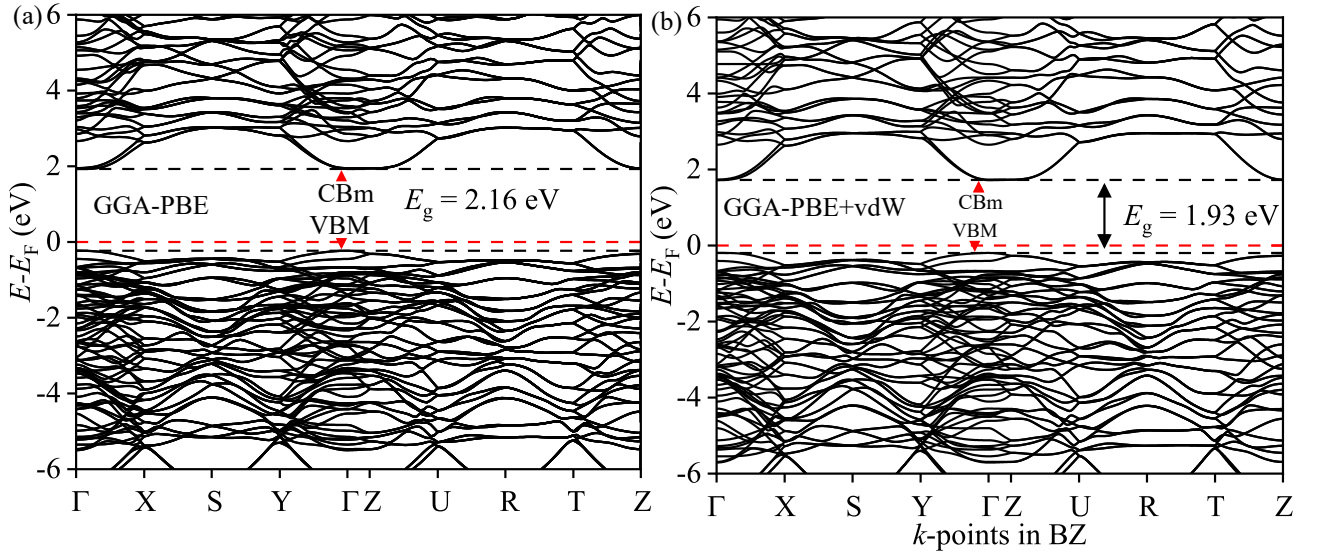

FIG. S3. Electronic BS of BWO for (a) GGA-PBE and (b) GGA-PBE+vdW functionals. The inclusion of vdW force reduces the band gap  $E_g$  in BS. The GGA-PBE predicts the erroneous direct nature of the band gap regardless of the vdW force.

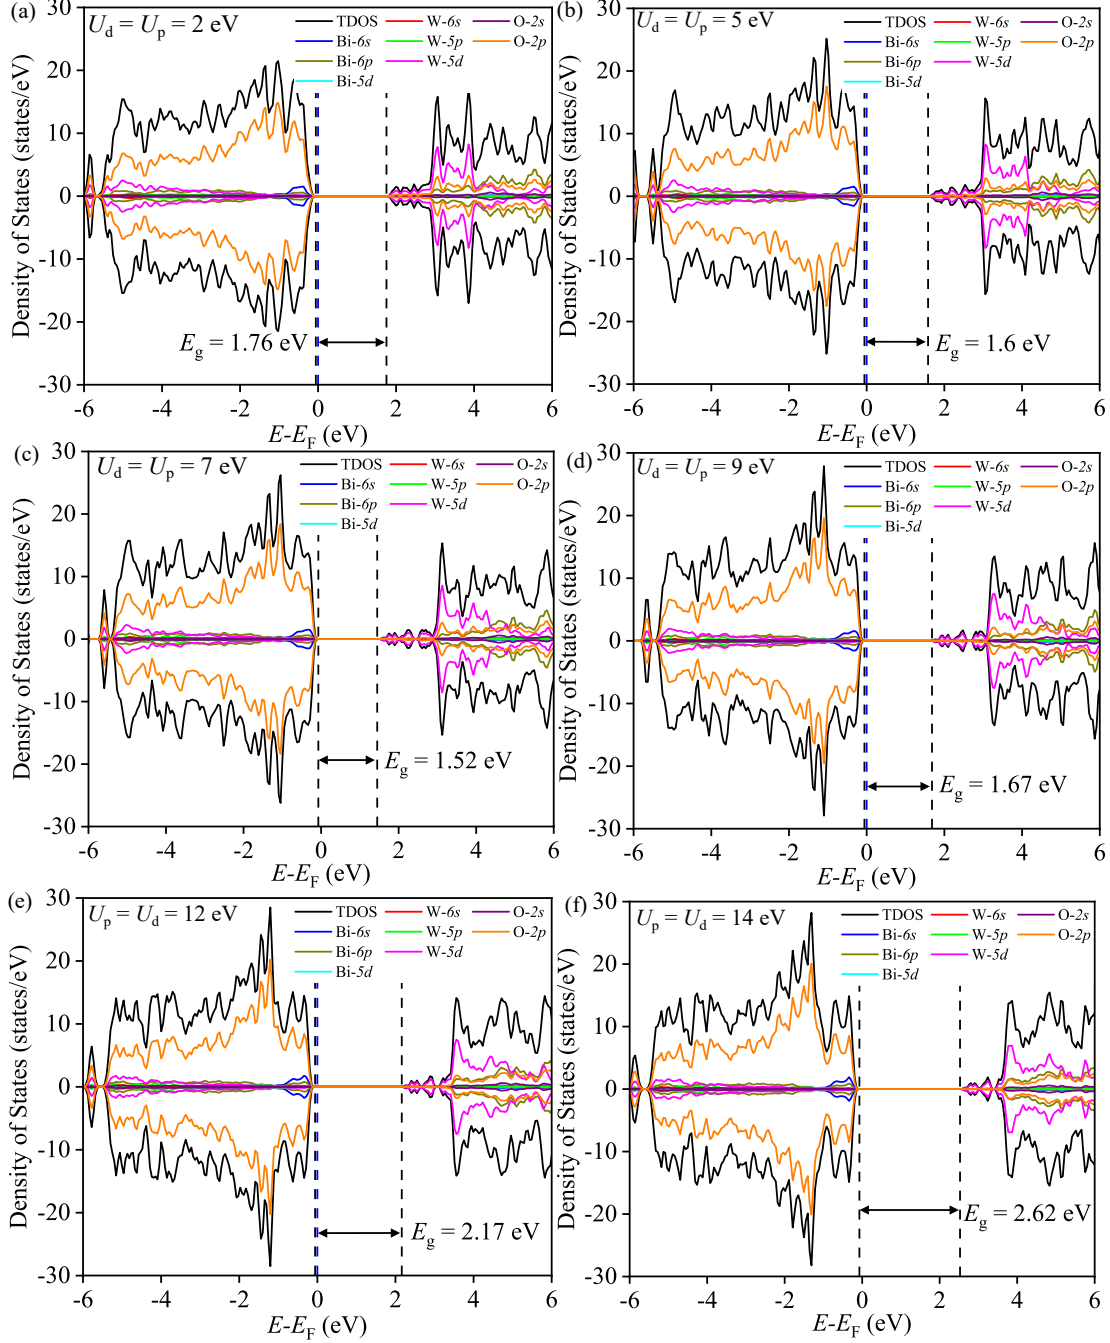

FIG. S4. TDOS and PDOS of BWO for GGA-PBE+ $U_d+U_p$  with (a)  $U_d = U_p = 2$  eV, (b)  $U_d = U_p = 5$  eV, (c)  $U_d = U_p = 7$  eV, (d)  $U_d = U_p = 9$  eV, (e)  $U_d = U_p = 12$  eV and (f)  $U_d = U_p = 14$  eV. The band gap  $E_g$  varies with different values of  $U_d$  and  $U_p$ .



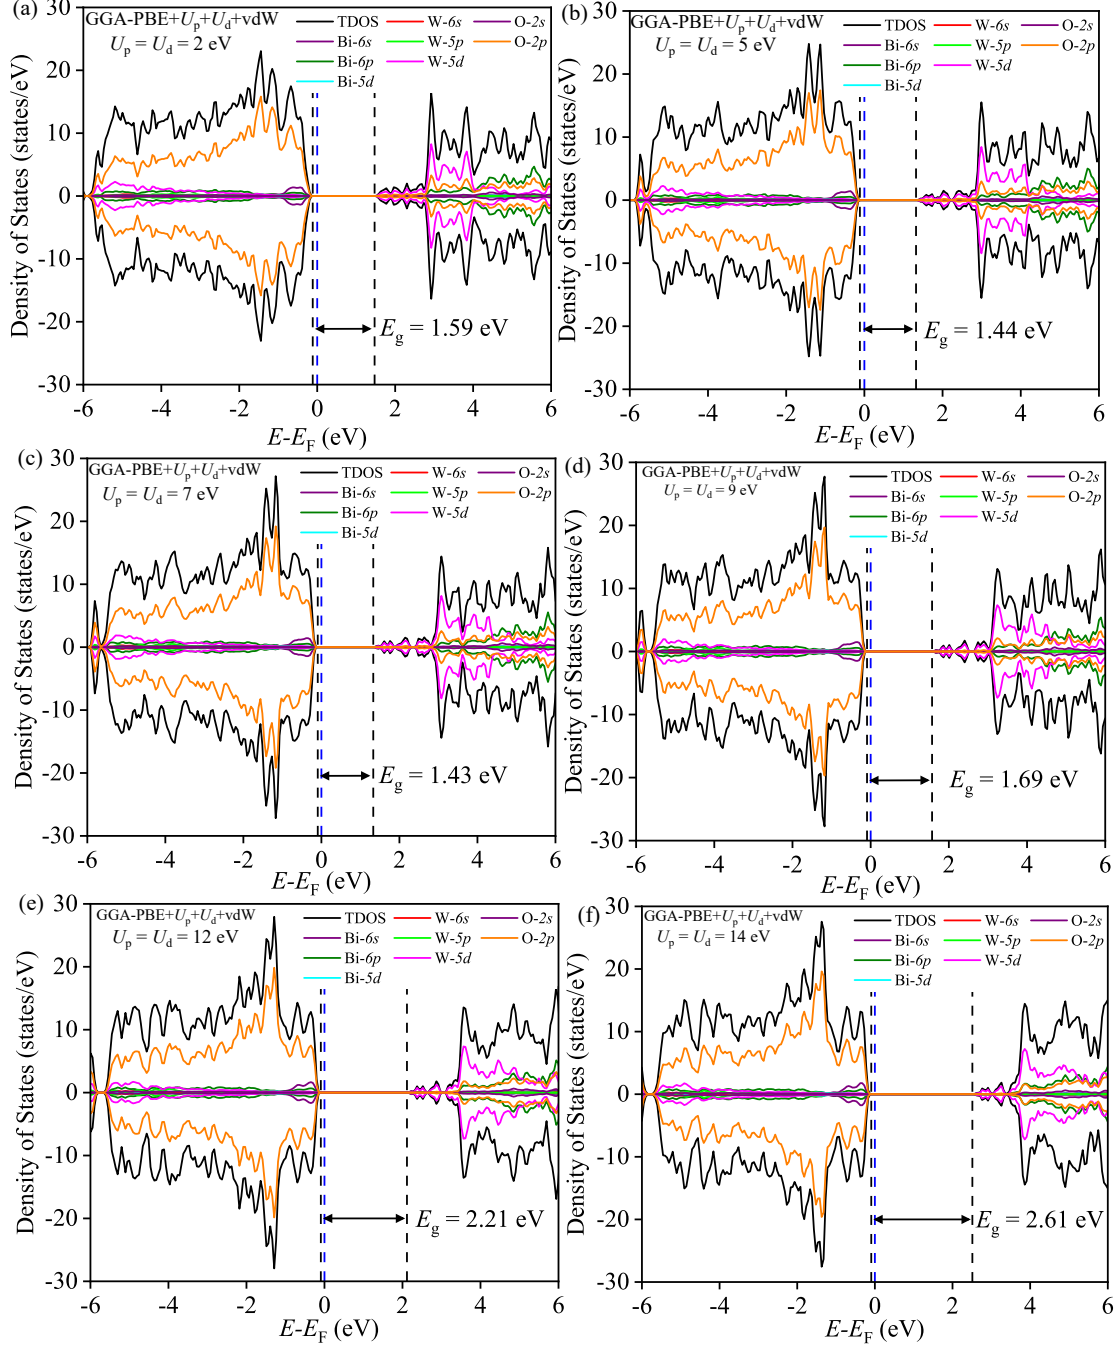

FIG. S5. The vdW force is included. TDOS and PDOS of BWO for GGA-PBE+ $U_d+U_p$ +vdW with (a)  $U_d = U_p = 2$  eV, (b)  $U_d = U_p = 5$  eV, (c)  $U_d = U_p = 7$  eV, (d)  $U_d = U_p = 9$  eV, (e)  $U_d = U_p = 12$  eV and (f)  $U_d = U_p = 14$  eV. The band gap  $E_g$  varies with different values of  $U_d$  and  $U_p$ .

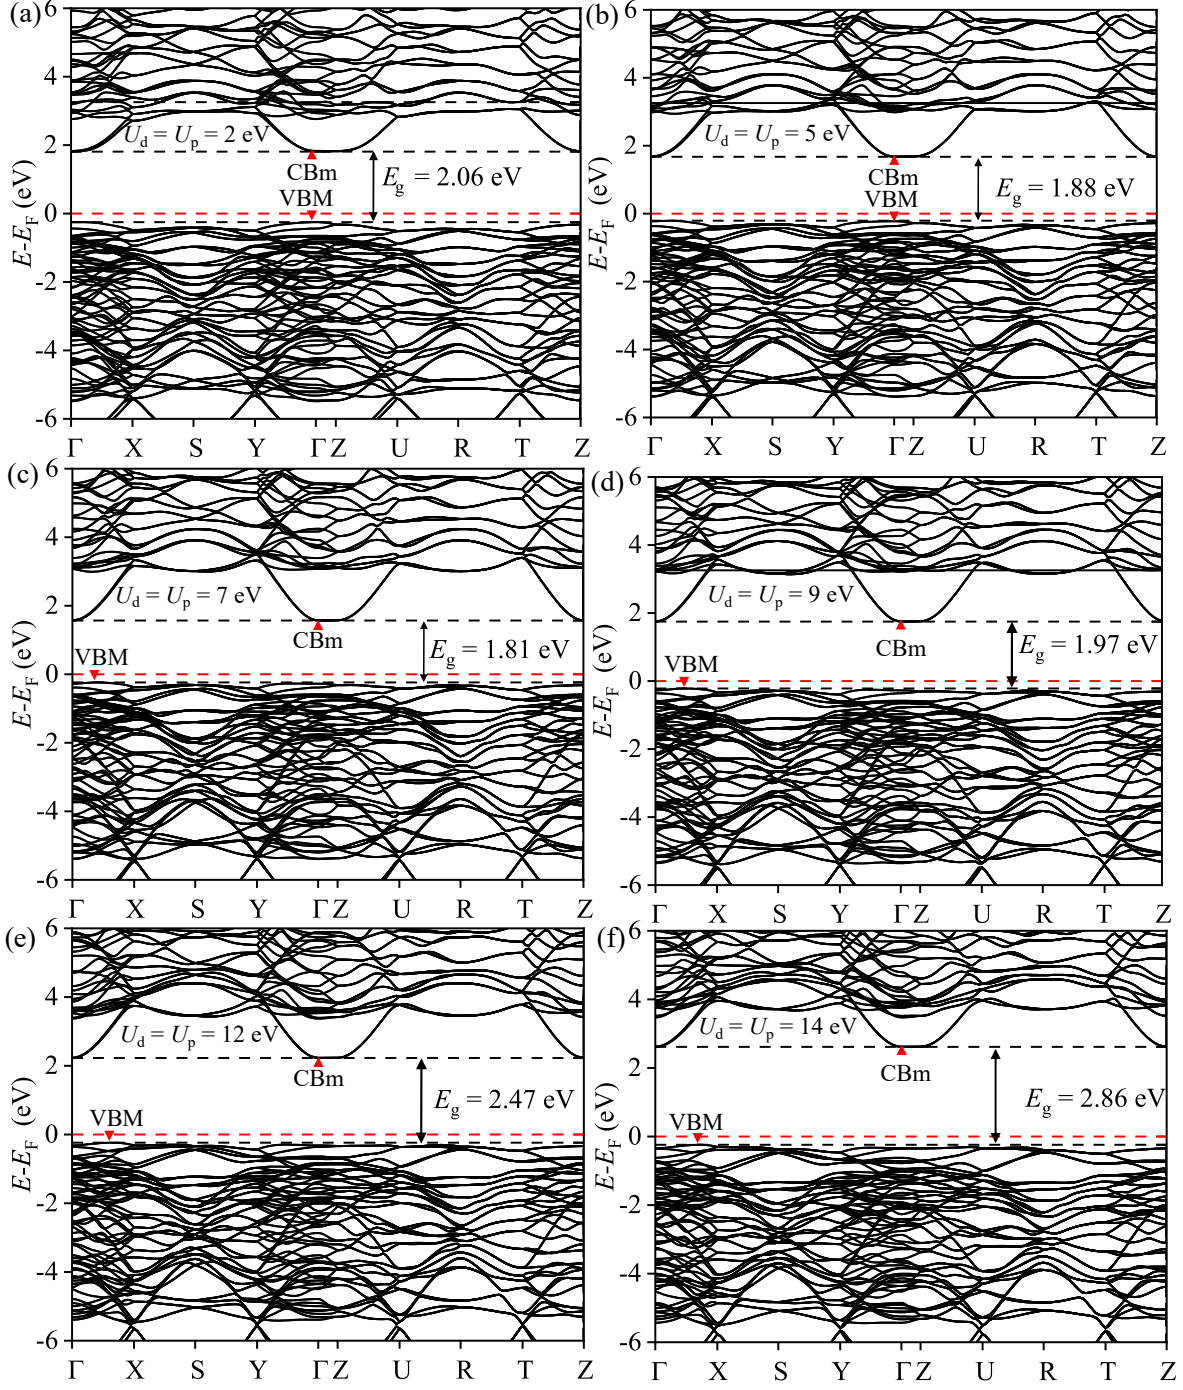

FIG. S6. Electronic BS of BWO in the absence of vdW force for GGA-PBE+ $U_d+U_p$  with (a)  $U_d = U_p = 2$  eV, (b)  $U_d = U_p = 5$  eV, (c)  $U_d = U_p = 7$  eV, (d)  $U_d = U_p = 9$  eV, (e)  $U_d = U_p = 12$  eV and (f)  $U_d = U_p = 14$  eV. The band gap  $E_g$  in the BS varies with different values of  $U_d$  and  $U_p$ .

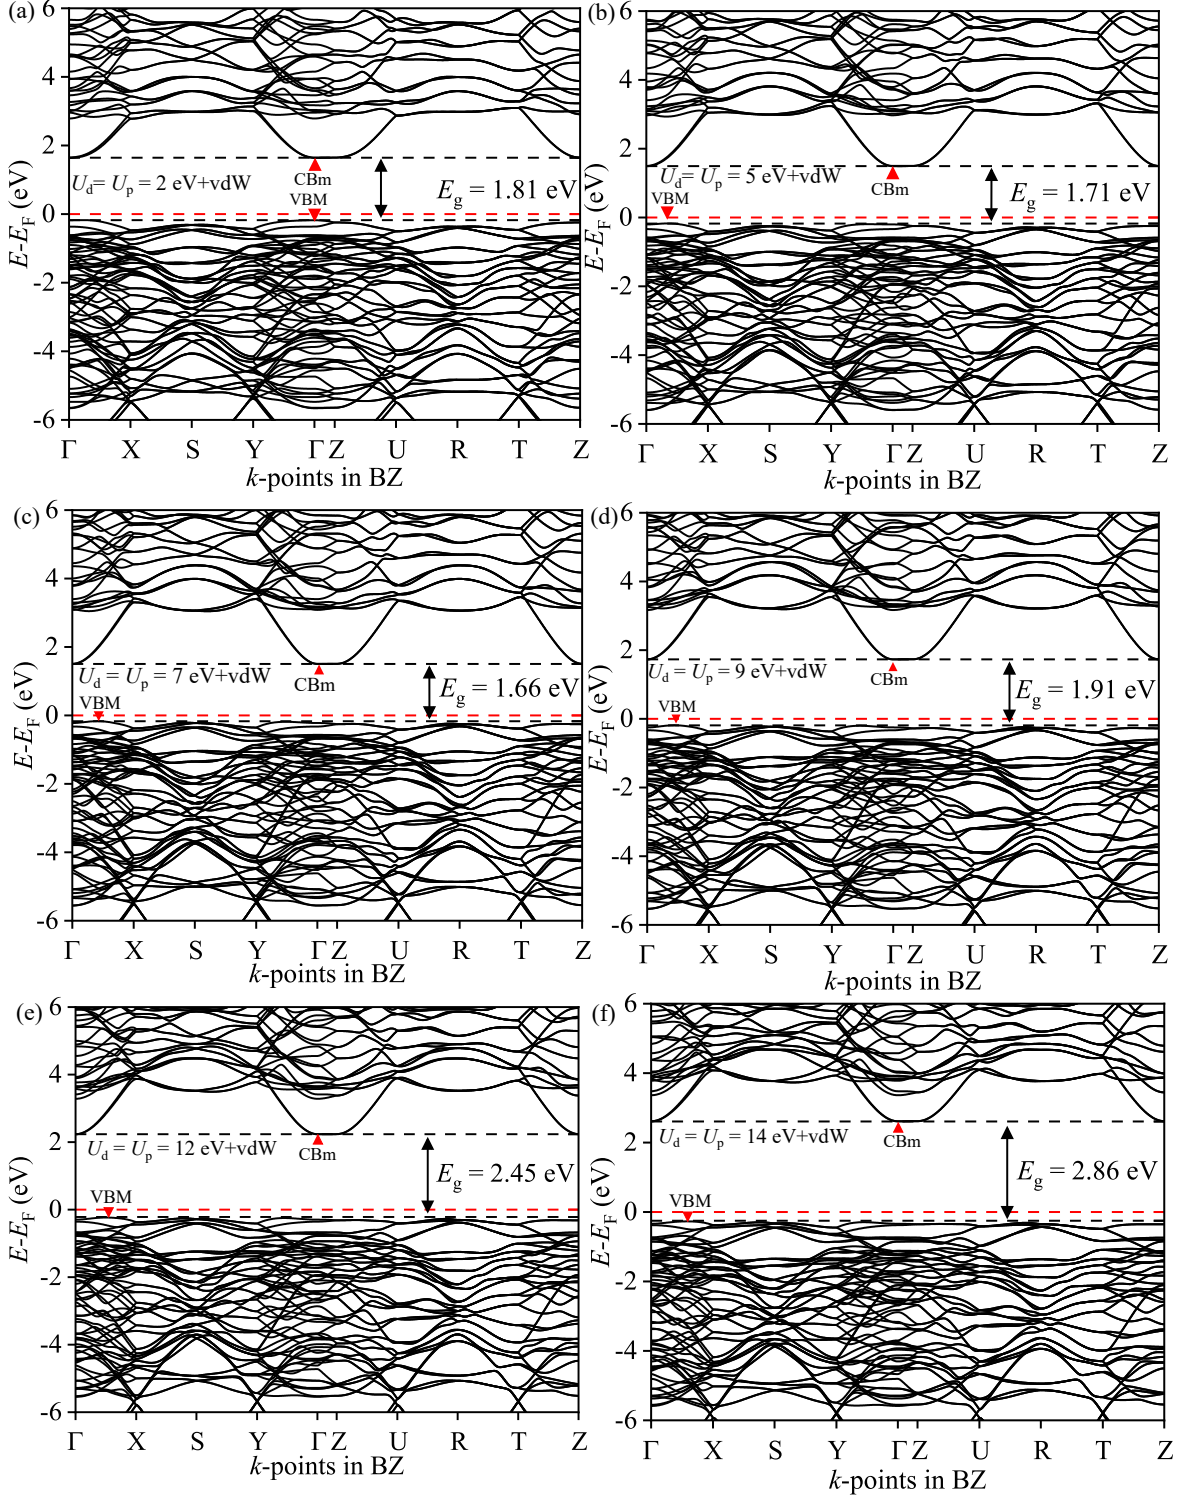

FIG. S7. The vdW force is included. Electronic BS of BWO for GGA-PBE+ $U_d+U_p$ +vdW with (a)  $U_d = U_p = 2$  eV, (b)  $U_d = U_p = 5$  eV, (c)  $U_d = U_p = 7$  eV, (d)  $U_d = U_p = 9$  eV, (e)  $U_d = U_p = 12$  eV and (f)  $U_d = U_p = 14$  eV. The band gap  $E_g$  in the BS varies with different values of  $U_d$  and  $U_p$ .

## VI. ELASTIC PROPERTIES SIMULATION

TABLE S6. Elastic constants ( $C_{ij}$ ), bulk moduli ( $B_V$ ,  $B_R$  and  $B_H$ ), shear moduli ( $G_V$ ,  $G_R$ ,  $G_H$ ), Young's moduli ( $E_V$ ,  $E_R$ ,  $E_H$ ), Poisson's ratio ( $\nu_V$ ,  $\nu_R$ ,  $\nu_H$ ) and Pugh's ratio ( $k_V$ ,  $k_R$ ,  $k_H$ ) in Voigt–Reuss–Hill framework for for BWO using GGA-PBE, GGA-PBE+ $U_d+U_p$  and GGA-PBE+ $U_d+U_p$ +vdW.

| Elastic Properties (E.P.) of BWO |         |                    |                         |
|----------------------------------|---------|--------------------|-------------------------|
| E.P.                             | GGA-PBE | GGA-PBE+ $U_d+U_p$ | GGA-PBE+ $U_d+U_p$ +vdW |
| $C_{11}$ (GPa)                   | 131.293 | 201.29             | 233.269                 |
| $C_{12}$ (GPa)                   | 4.028   | 68.734             | 90.058                  |
| $C_{13}$ (GPa)                   | 42.544  | 48.644             | 58.849                  |
| $C_{22}$ (GPa)                   | 103.827 | 190.576            | 215.771                 |
| $C_{23}$ (GPa)                   | 12.643  | 8.052              | 18.775                  |
| $C_{33}$ (GPa)                   | 98.635  | 100.703            | 106.653                 |
| $C_{44}$ (GPa)                   | 44.365  | 36.669             | 39.994                  |
| $C_{55}$ (GPa)                   | 60.567  | 70.187             | 80.6                    |
| $C_{66}$ (GPa)                   | 33.829  | 104.078            | 106.212                 |
| $B_V$ (GPa)                      | 50.240  | 82.600             | 99.010                  |
| $B_R$ (GPa)                      | 48.632  | 68.254             | 78.834                  |
| $B_H$ (GPa)                      | 49.438  | 75.428             | 88.920                  |
| $G_V$ (GPa)                      | 46.050  | 66.660             | 71.230                  |
| $G_R$ (GPa)                      | 43.064  | 56.286             | 60.287                  |
| $G_H$ (GPa)                      | 44.559  | 61.474             | 65.758                  |
| $E_V$ (GPa)                      | 105.830 | 157.590            | 172.350                 |
| $E_R$ (GPa)                      | 99.749  | 132.449            | 144.122                 |
| $E_H$ (GPa)                      | 102.794 | 145.024            | 158.261                 |
| $\nu_V$                          | 0.150   | 0.180              | 0.210                   |
| $\nu_R$                          | 0.158   | 0.177              | 0.195                   |
| $\nu_H$                          | 0.153   | 0.180              | 0.203                   |
| $k_V$                            | 1.090   | 1.240              | 1.390                   |
| $k_R$                            | 1.129   | 1.213              | 1.308                   |
| $k_H$                            | 1.109   | 1.227              | 1.352                   |

## VII. BORN CHARGE

The Born effective charge (BEC) embodies the atomic charge dynamics. The BEC has its origin in the screening of long-range Coulomb potential of the ions whose motion forms the phonon characteristics. The simulated BEC tensor is displayed in Table S7 for both GGA-PBE+vdW and GGA-PBE+ $U_d+U_p$ +vdW.

TABLE S7. Born effective charge tensor of BWO using GGA-PBE+vdW and GGA-PBE+ $U_d+U_p$ +vdW.

|                         | $Z_B$ | Position | xx     | xy     | xz     | yx     | yy     | yz     | zx     | zy     | zz     |
|-------------------------|-------|----------|--------|--------|--------|--------|--------|--------|--------|--------|--------|
| BWO                     | Bi    | 4a       | 4.779  | -0.263 | 0.495  | -0.201 | 4.793  | 0.010  | 0.907  | 0.536  | 4.453  |
| GGA-PBE+vdW             | Bi    | 4a       | 4.781  | 0.264  | 0.493  | 0.202  | 4.792  | -0.011 | 0.907  | -0.536 | 4.454  |
|                         | W     | 4a       | 8.196  | 0.005  | 0.450  | -0.003 | 6.820  | 0.001  | 0.411  | 0.000  | 7.989  |
|                         | O1    | 4a       | -2.207 | 0.042  | 1.306  | 0.301  | -2.201 | 0.639  | 1.214  | 1.222  | -4.509 |
|                         | O2    | 4a       | -3.699 | -2.142 | -0.434 | -2.112 | -3.039 | -0.339 | -0.404 | -0.254 | -1.342 |
|                         | O3    | 4a       | -3.696 | 2.143  | -0.432 | 2.112  | -3.042 | 0.340  | -0.402 | 0.256  | -1.341 |
|                         | O4    | 4a       | -2.206 | 0.041  | 1.305  | 0.302  | -2.202 | 0.571  | 1.212  | 1.225  | -4.509 |
|                         | O5    | 4a       | -2.974 | -0.254 | 0.452  | 0.117  | -2.961 | 0.150  | 0.193  | 0.218  | -2.598 |
|                         | O6    | 4a       | -2.975 | 0.253  | -0.452 | -0.116 | -2.961 | 0.150  | -0.193 | 0.218  | -2.598 |
|                         | BWO   | Bi       | 4a     | 4.791  | -0.272 | 0.620  | -0.362 | 4.736  | 0.123  | 1.028  | 0.385  |
| GGA-PBE+ $U_d+U_p$ +vdW | Bi    | 4a       | 4.791  | 0.272  | 0.620  | 0.362  | 4.735  | -0.123 | 1.028  | -0.385 | 4.251  |
|                         | W     | 4a       | 8.357  | 0.002  | 0.502  | -0.002 | 7.950  | 0.000  | 0.573  | 0.000  | 8.582  |
|                         | O1    | 4a       | -2.450 | 0.160  | 1.230  | 0.370  | -2.190 | 0.222  | 1.262  | 0.506  | -4.382 |
|                         | O2    | 4a       | -3.560 | -2.058 | -0.134 | -2.187 | -3.527 | -0.099 | -0.075 | 0.005  | -1.657 |
|                         | O3    | 4a       | -3.560 | 2.058  | -0.134 | 2.187  | -3.528 | 0.173  | -0.075 | -0.004 | -1.657 |
|                         | O4    | 4a       | -2.450 | 0.160  | 1.230  | 0.370  | -2.190 | 0.223  | 1.262  | 0.506  | -4.383 |
|                         | O5    | 4a       | -2.960 | -0.320 | 0.405  | 0.256  | -2.993 | 0.249  | 0.130  | 0.276  | -2.502 |
| O6                      | 4a    | -2.959   | 0.320  | -0.405 | -0.256 | -2.993 | 0.249  | -0.130 | 0.276  | -2.502 |        |
